# Supplementary material for: Evaluation of a kDNA-Based qPCR Assay for the Detection and Quantification of Old World Leishmania Species
Source: MDPI journal article supplement (doi:10.3390/microorganisms8122006), 2020-12-16
Supplement: s1 [file s1]

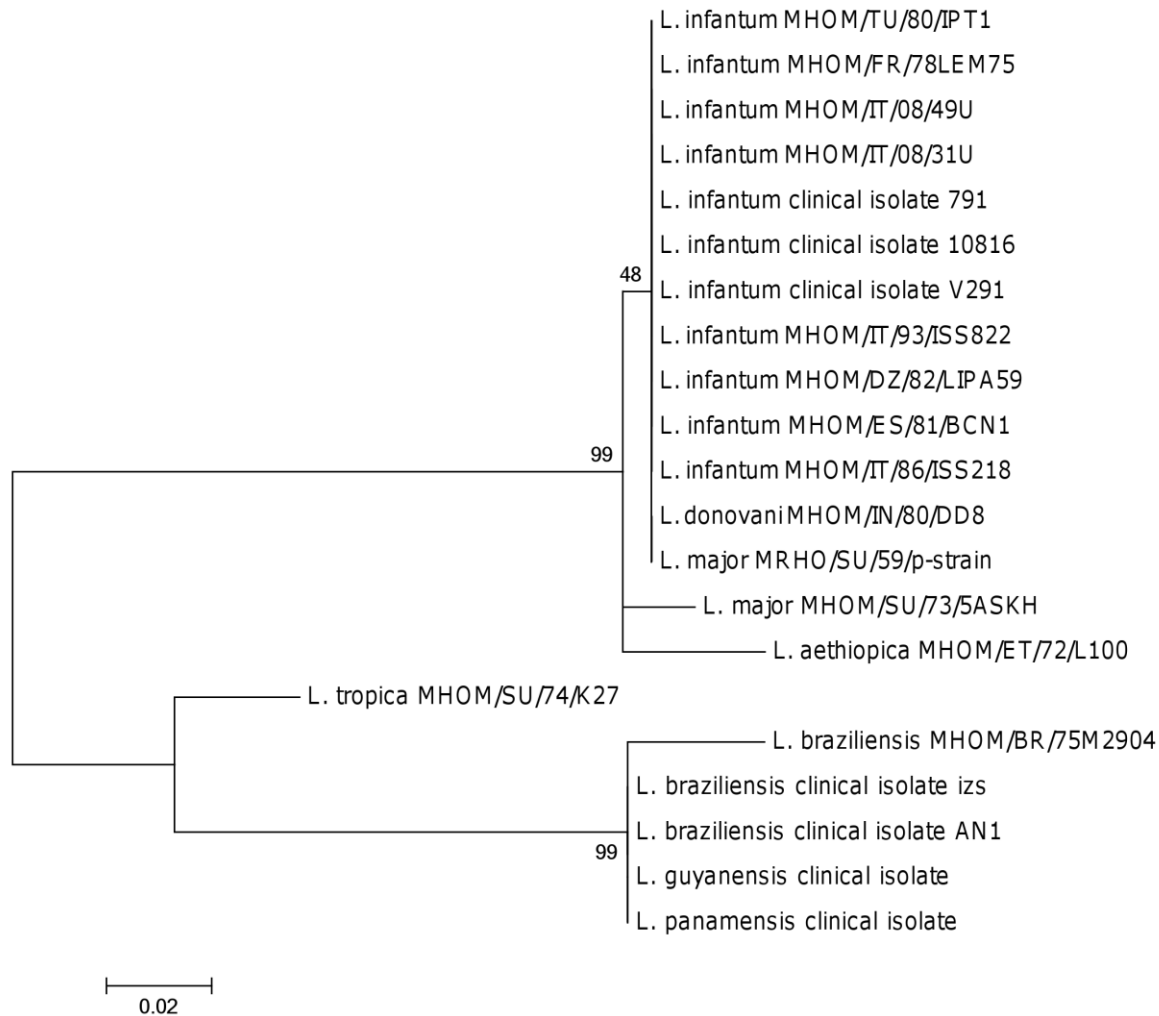

**Figure S1.** Maximum likelihood phylogenetic tree of qPCR-ML amplicons. The tree was constructed using the nearest neighbor interchange method with MEGA 6.0 software.
